# Supplementary material for: Hierarchical NiMn2O4@CNT nanocomposites for high-performance asymmetric supercapacitors
Source: Royal Society of Chemistry journal article supplement (doi:10.1039/c5ra00979k), 2015-01-01
Supplement: c5ra00979k1.pdf [file c5ra00979k1.pdf]

Supporting Information

**Hierarchical CNT@NiMn<sub>2</sub>O<sub>4</sub> Nanocomposites for High-Performance  
Asymmetric Supercapacitors**

Honghong Nan, Wenqin Ma, Zhengxiang Gu, Baoyou Geng, Xiaojun Zhang\*

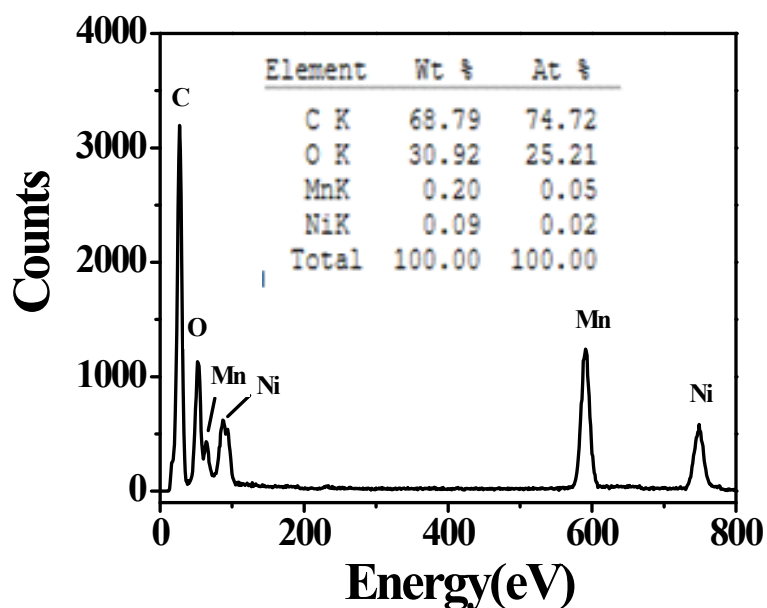

**Figure S1** Energy-dispersive X-ray spectroscopy (EDS) data taken from the as-synthesized CNT@NiMn<sub>2</sub>O<sub>4</sub> Nanocomposites.

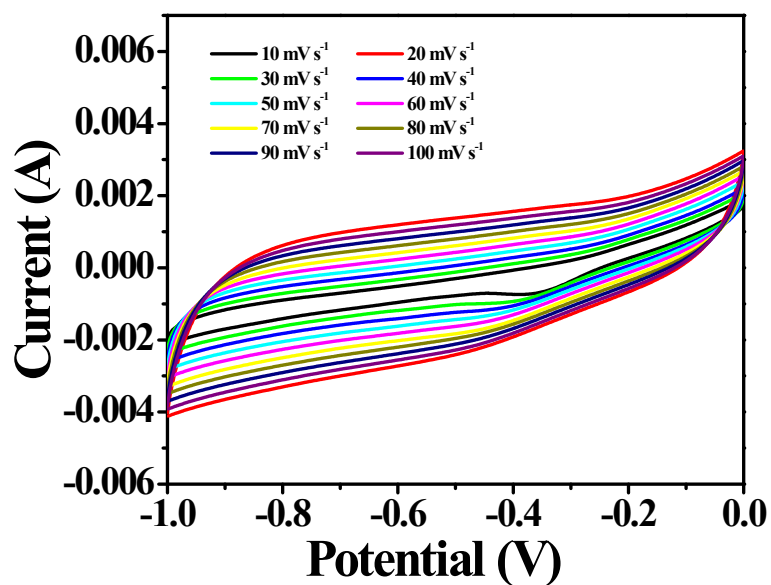

**Figure S2** Cyclic Voltammetry (CV) curves of activated carbon(AC) as the working electrode at different scan rates.

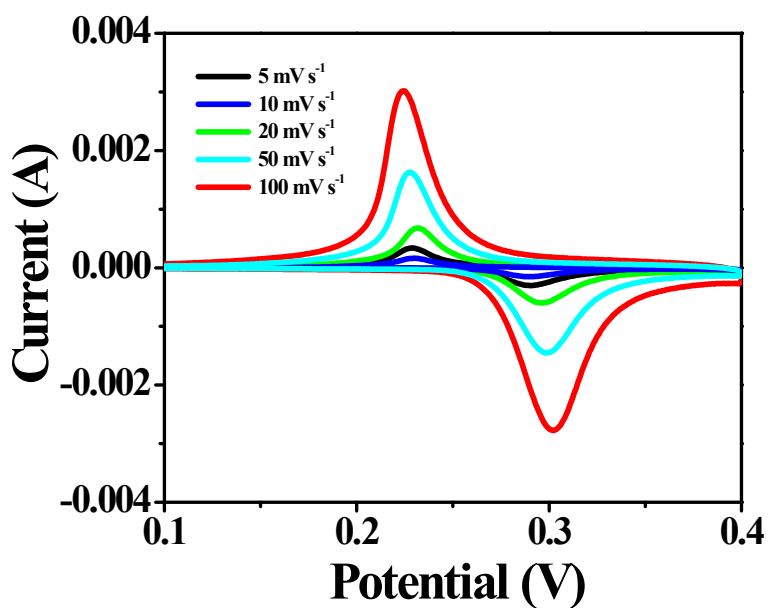

**Figure S3** Cyclic Voltammetry (CV) curves of Ni foil as the working electrode at different scan rates.

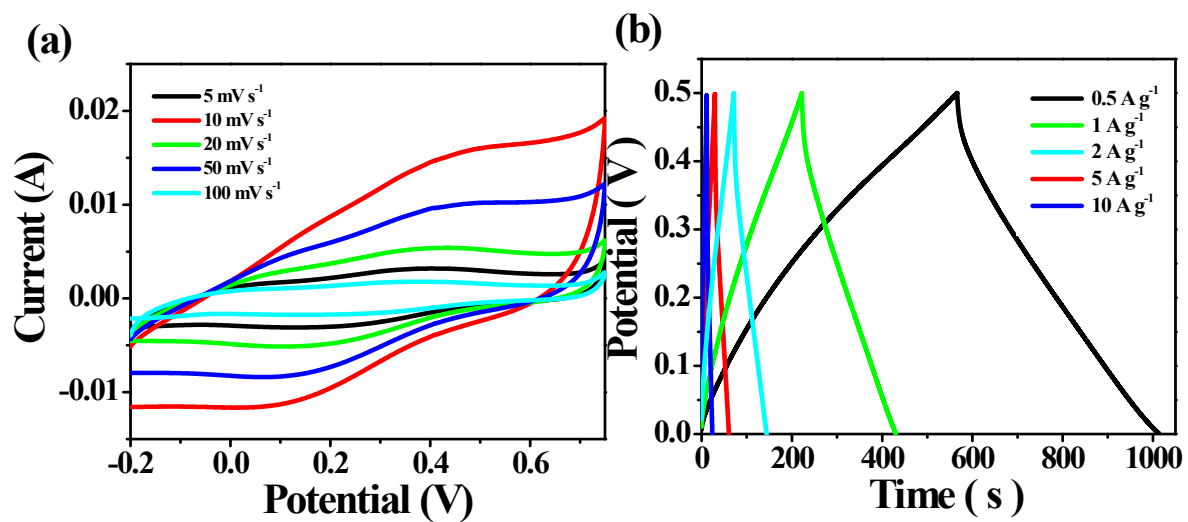

**Figure S4** (a) Cyclic Voltammetry (CV) curves of NiMn<sub>2</sub>O<sub>4</sub> as the working electrode at different scan rates; (b) galvanostatic charge-discharge curves of the NiMn<sub>2</sub>O<sub>4</sub> at different current densities.
